# Supplementary material for: Modulating the electronic interaction between Au and nitrogen-rich porous organic polymers for enhanced CO2 hydrogenation to formic acid
Source: Royal Society of Chemistry journal article supplement (doi:10.1039/d4cy01151a), 2024-11-26
Supplement: d4cy01151a1.pdf [file d4cy01151a1.pdf]

## Supporting Information

### **Au Species Supported on Nitrogen-rich Porous Organic Polymers for CO<sub>2</sub> Hydrogenation to Formic Acid**

Huixin Yan, Xingyan Wang, Xiaoyu Liang, Xinxin Zhang, LongFei Liu,  
Min Ji, Min Wang\* and Xinkui Wang\*

School of Chemistry, Dalian University of Technology, Dalian 116024, Liaoning, China.

\*Corresponding author: Xinkui Wang: wangxinkui@dlut.edu.cn; Min Wang: wangmin@dlut.edu.cn

|                                                                                                                                                                                                                                 |   |
|---------------------------------------------------------------------------------------------------------------------------------------------------------------------------------------------------------------------------------|---|
| <b>Experimental Section</b> .....                                                                                                                                                                                               | 1 |
| <b>Synthesis of Pd/Trz-DETA, Ag/Trz-DETA and Ru/Trz-DETA</b> .....                                                                                                                                                              | 1 |
| <b>Quantitative analysis</b> .....                                                                                                                                                                                              | 1 |
| <b>Characterization of the catalysts</b> .....                                                                                                                                                                                  | 1 |
| <b>Supporting Figures</b> .....                                                                                                                                                                                                 | 1 |
| <b>Fig. S1</b> Tautomeric forms of Trz-TETA. ....                                                                                                                                                                               | 1 |
| <b>Fig. S2</b> EDX spectra analysis and images of (a) Au/Trz-DETA and (b) Au/Trz-TEPA with the corresponding element mapping signals of C, N and Au. ....                                                                       | 2 |
| <b>Fig. S3</b> (a) XRD patterns of Au/Trz-DETA catalyst with different Au loading amounts. (b) XPS survey spectra of Au/Trz-DETA, Au/Trz-TETA and Au/Trz-TEPA. ....                                                             | 3 |
| <b>Fig. S4</b> (a) <sup>1</sup> H NMR spectra of the reaction solution (b) GC spectra of gas after reaction .....                                                                                                               | 3 |
| <b>Fig. S5</b> (a) Reactivity comparison of Trz-DETA loading with different metals.(1.5 wt% metal loadings) (b) Catalytic activity of Au/Trz-DETA catalyst with different Au loadings. ....                                     | 4 |
| <b>Fig. S6</b> (a) Catalyst recycling of Au/Trz-TETA. (b) HAADF-STEM image of Au/Trz-DETA after cycling five times.....                                                                                                         | 4 |
| <b>Fig. S7</b> (a) Reactivity comparison of various solvents of Au/Trz-DETA and Au/Trz-TEPA. (b) Catalytic activity of Au/Trz-TETA at different volume ratios of H <sub>2</sub> O and methanol (V <sub>total</sub> = 5 mL)..... | 5 |
| <b>Fig. S8</b> CO <sub>2</sub> adsorption and activation on Au/Trz-TETA catalysts .....                                                                                                                                         | 5 |
| <b>Supporting Tables</b> .....                                                                                                                                                                                                  | 5 |
| <b>Table S1</b> The actual Au loadings of various catalysts determined by ICP-AES .....                                                                                                                                         | 5 |
| <b>Table S2</b> Textural parameters of Trz-DETA, Trz-TETA, Trz-TEPA and Au/Trz-TETA.....                                                                                                                                        | 6 |
| <b>References</b> .....                                                                                                                                                                                                         | 6 |

## Experimental Section

### Synthesis of Pd/Trz-DETA, Ag/Trz-DETA and Ru/Trz-DETA

The Pd/Trz-DETA catalyst was prepared with a NaBH<sub>4</sub> wet chemical reduction method. Typically, 0.3 g of Trz-DETA was dispersed in 100 mL of ethanol and ultrasounded for 15 min. Then a solution of aqueous PdCl<sub>2</sub> (1.0 g/50 mL, 0.38 mL) in 100 mL of ethanol was added rapidly to the above mixture at 80 °C, followed by stirring for 30 min. A 14-fold excess of NaBH<sub>4</sub> was added and the mixture was stirred continuously for 2 h at 80 °C. After the reaction, the product was collected by filtration and washed several times with water and ethanol. Finally, Pd/Trz-DETA was obtained by vacuum drying at 60 °C. Ag/Trz-DETA and Ru/Trz-TEPA were synthesized by a similar method as that of Pd/Trz-TEPA, and were obtained using aqueous AgNO<sub>3</sub> solution (1.0 g/50 mL, 0.35 mL) and aqueous RuCl<sub>3</sub> solution (1.0 g/50 mL, 0.52 mL), respectively.

### Quantitative analysis

Formic acid yield calculation formula:

$$m_i \text{ (g)} = \frac{A_s \times I_i \times M_i}{A_i \times I_s \times M_s} \times m_s \qquad \text{TON} = \frac{N_{\text{HCOOH}}}{N_{\text{Au}}}$$

Where  $m_i$  is the yield of formic acid,  $m_s$  is the mass of DMSO,  $A_s$  and  $A_i$  are the H atoms numbers of DMSO and formic acid,  $I_s$  and  $I_i$  are the integral areas of DMSO and formic acid,  $M_s$  and  $M_i$  are the molar mass of DMSO and formic acid, and  $N_{\text{HCOOH}}$  and  $N_{\text{Au}}$  are the molar quantity formic acid and Au.

## Characterization of the catalysts

### Supporting Figures

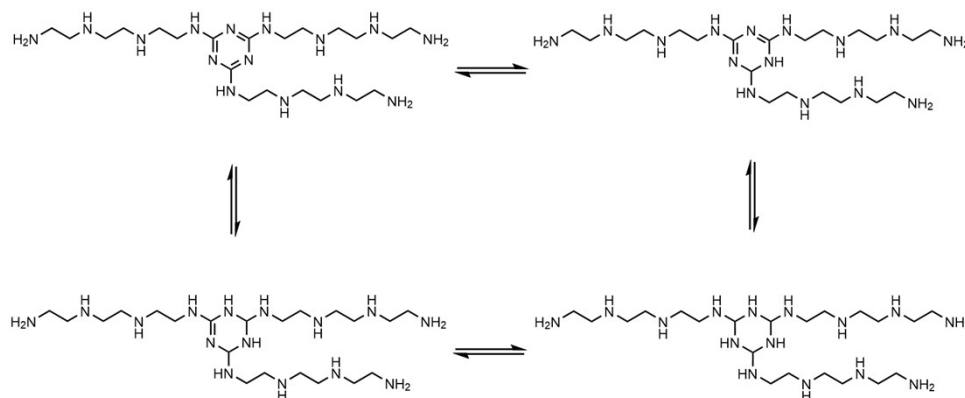

Fig. S1 Tautomeric forms of Trz-TETA.

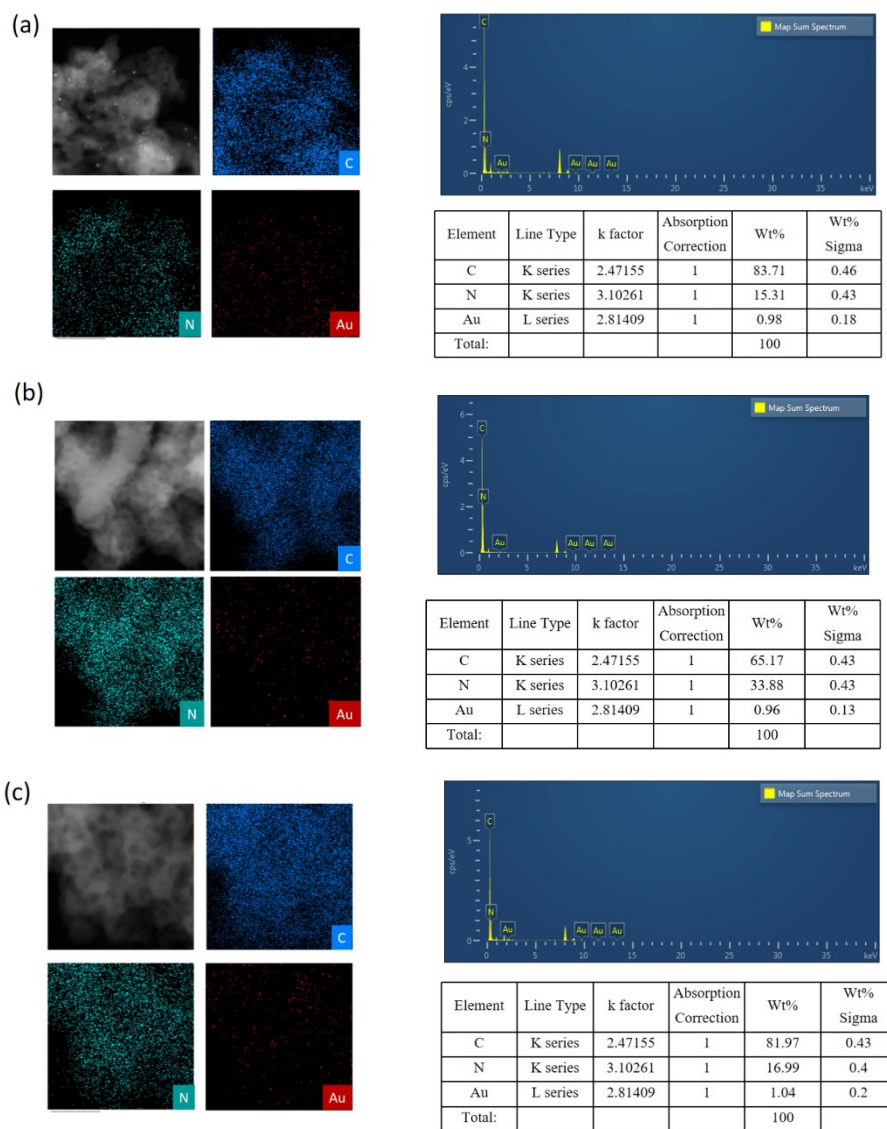

**Fig. S2** EDX spectra analysis and images of (a) Au/Trz-DETA and (b) Au/Trz-TEPA with the corresponding element mapping signals of C, N and Au.

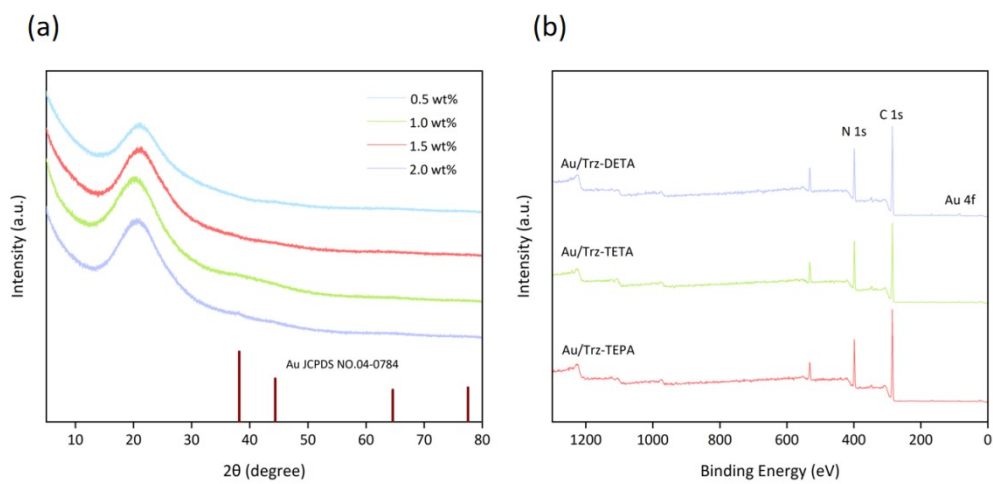

**Fig. S3** (a) XRD patterns of Au/Trz-DETA catalyst with different Au loading amounts. (b) XPS survey spectra of Au/Trz-DETA, Au/Trz-TETA and Au/Trz-TEPA.

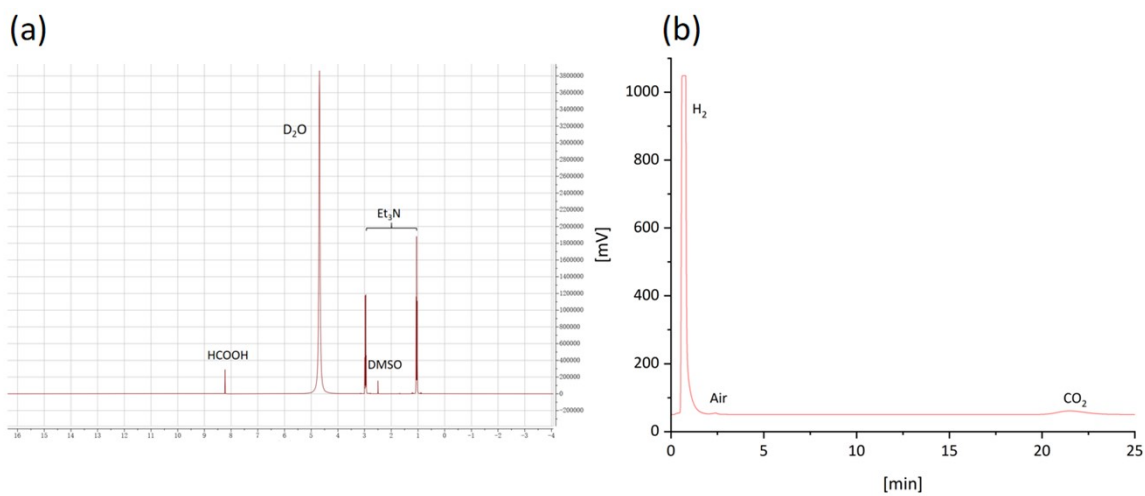

**Fig. S4** (a)  $^1\text{H}$  NMR spectra of the reaction solution (b) GC spectra of gas after reaction

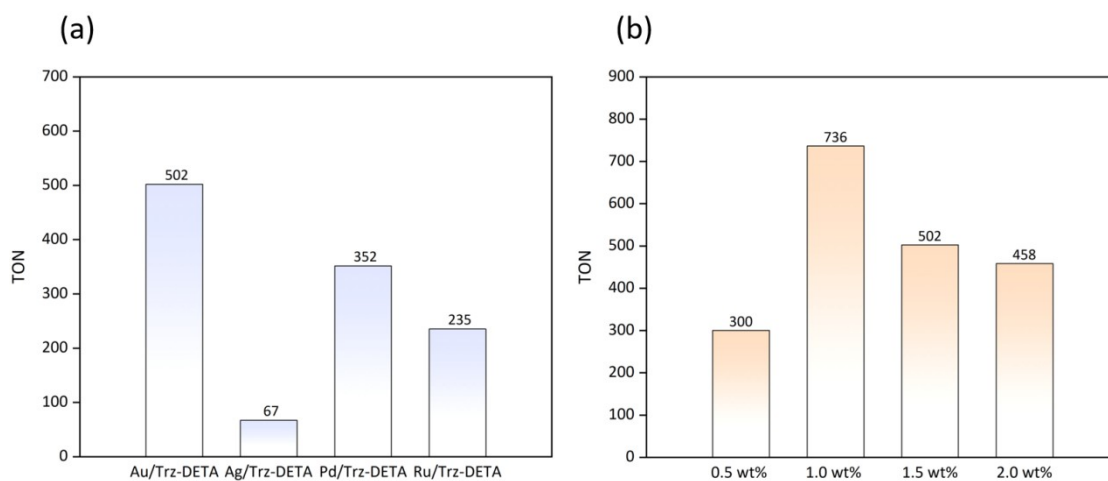

**Fig. S5** (a) Reactivity comparison of Trz-DETA loading with different metals. (1.5 wt% metal loadings) (b) Catalytic activity of Au/Trz-DETA catalyst with different Au loadings.

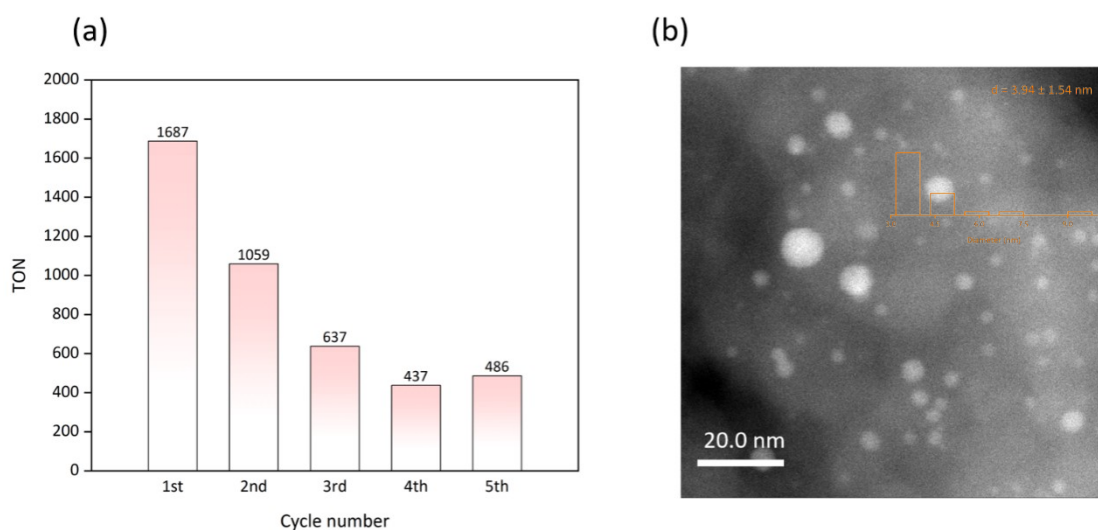

**Fig. S6** (a) Catalyst recycling of Au/Trz-TETA. (b) HAADF-STEM image of Au/Trz-DETA after cycling five times.

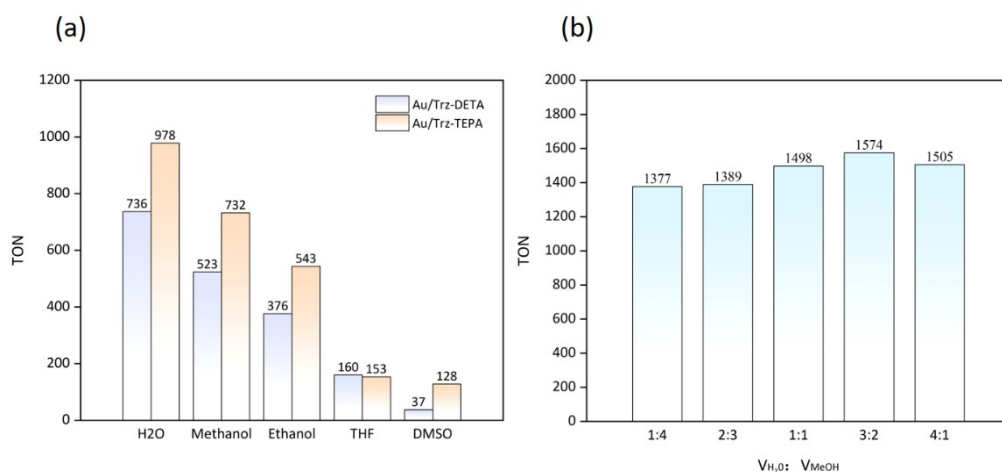

**Fig. S7** (a) Reactivity comparison of various solvents of Au/Trz-DETA and Au/Trz-TEPA. (b) Catalytic activity of Au/Trz-TETA at different volume ratios of H<sub>2</sub>O and methanol (V<sub>total</sub> = 5 mL).

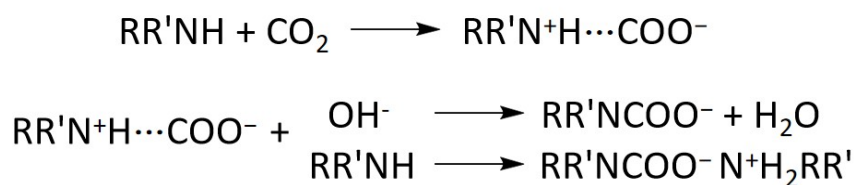

**Fig. S8** CO<sub>2</sub> adsorption and activation on Au/Trz-TETA catalysts

## Supporting Tables

**Table S1** The actual Au loadings of various catalysts determined by ICP-AES

| Catalyst    | Theory (wt. %) | Actual (wt. %) |
|-------------|----------------|----------------|
| Au/Trz-DETA | 0.50           | 0.53           |
|             | 1.00           | 1.02           |
|             | 1.50           | 1.47           |
|             | 2.00           | 2.08           |
| Au/Trz-TETA | 1.00           | 0.98           |
| Au/Trz-TEPA | 1.00           | 0.96           |

**Table S2** Textural parameters of Trz-DETA, Trz-TETA, Trz-TEPA and Au/Trz-TETA

|             | $S_{\text{BET}}/\text{m}\cdot\text{g}^{-1}$ | $D_{\text{AVG}}/\text{nm}$ | $D_{\text{MODE}}/\text{nm}$ | $V_{\text{TOTAL}}/\text{cm}^3\cdot\text{g}^{-1}$ |
|-------------|---------------------------------------------|----------------------------|-----------------------------|--------------------------------------------------|
| Trz-DETA    | 52                                          | 24.40                      | 3.714                       | 0.30                                             |
| Trz-TETA    | 47                                          | 26.96                      | 4.448                       | 0.33                                             |
| Trz-TEPA    | 43                                          | 35.68                      | 32.26                       | 0.37                                             |
| Au/Trz-TETA | 52                                          | 34.06                      | 3.308                       | 0.43                                             |

## References

- 1 M. Niksefat, J. Rahimi, A. Maleki and A. S. Nia, *Algal Res.*, 2023, **70**, 103003.
- 2 W. Zhan, Y. Shu, Y. Sheng, H. Zhu, Y. Guo, L. Wang, Y. Guo, J. Zhang, G. Lu and S. Dai, *Angewandte Chemie-International Edition*, 2017, **56**, 4494-4498.
